# Supplementary material
Source: PubMed Central journal article supplement (PMC6064999)
Supplement: pnas.1721443115.sapp.pdf [file pnas.1721443115.sapp.pdf]

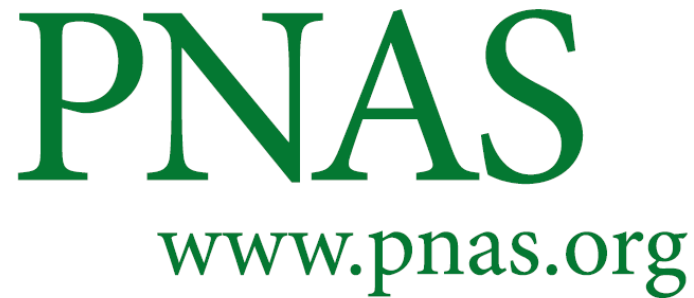

## Supplementary Information for

Scleral hypoxia is a target for myopia control

Hao Wu, Wei Chen, Fei Zhao, Qingyi Zhou, Peter S. Reinach, Lili Deng, Li Ma, Shumeng Luo, Nethrajeith Srinivasalu, Miaozen Pan, Yang Hu, Xiaomeng Pei, Jing Sun, Ran Ren, Yinghui Xiong, Zhonglou Zhou, Sen Zhang, Geng Tian, Jianhuo Fang, Lina Zhang, Jidong Lang, Deng Wu, Changqing Zeng, Jia Qu, Xiangtian Zhou

Xiangtian Zhou, Jia Qu, Changqing Zeng.

Xiangtian Zhou, [zxt@mail.eye.ac.cn](mailto:zxt@mail.eye.ac.cn); [jqu@wmu.edu.cn](mailto:jqu@wmu.edu.cn); [czeng@big.ac.cn](mailto:czeng@big.ac.cn).

### **This PDF file includes:**

SI Materials and Methods

Figs. S1 to S12

Tables S1 to S8

References for SI reference citations

# SI Materials and Methods

## Experimental myopia and ocular biometric measurements

Male C57BL/6 mice, about 3 weeks old, were obtained from Beijing Vital River Laboratory Animal Technology Co., Ltd. (Beijing, China) and Shanghai SLAC Laboratory Animal Co., Ltd (Shanghai, China). Mice were raised in standard mouse cages with a 12h:12h light-dark cycle at Tsing Hua University and at the Wenzhou Medical University. For both eyes of each mouse, refraction was measured by an eccentric infrared photorefractor (1), and those with an interocular difference of <3.00 diopters (D) were selected for the study. Ocular biometrics was measured by optical coherence tomography (2). Monocular form-deprivation (FD) myopia was induced by gluing a translucent occluder over the right eye, designated as the FD eye (1). The contralateral eye was untreated and designated as the control eye. Mice that failed to develop myopia were eliminated, as were those with any ocular inflammation.

Three-week-old guinea pigs (*Cavia porcellus*, the English short hair stock, Bikai Experimental Animal Farm, Jiangsu, China) were subjected to monocular visual manipulation with either a negative lens (-4.00 D) or a latex facemask worn over one eye to establish a lens-induction (LI) or FD myopic model, respectively (3, 4). Recovery from LI or FD was performed by removal of facemask or lens from the eye. These animals were raised with a 12h:12h light-dark cycle at Wenzhou Medical University. Refraction of each eye was measured by an eccentric infrared photorefractor while ocular axial length and vitreous chamber depth were measured by A-scan ultrasonography (3, 5). Only animals with anisometropia of less than 2.00 D were used.

## Drug preparation and *in vivo* injection

To determine the effect of anti-hypoxic drugs on myopia development, we chose two compounds, salidroside with a purity of  $\geq 99.4\%$  (National Institutes for Food and Drug Control, Beijing, China) and formononetin with a purity of  $\geq 99.0\%$  (Sigma). Each guinea pig received unilateral injections (100  $\mu$ l in the inferior periocular region) of these drugs daily for 4 weeks. Salidroside, dissolved in normal saline, was injected at low and high dosages of 1  $\mu$ g per eye and 10  $\mu$ g per eye respectively, with normal saline injections used as a vehicle control. Formononetin was dissolved in 0.1% dimethyl sulfoxide (DMSO) and injected at either 0.5  $\mu$ g per eye or 5.0  $\mu$ g per eye, with DMSO serving as a vehicle control.

To determine the individual roles of eIF2 and mTOR signaling in mediating changes in the refractive state of mice, GSK2606414 (an eIF2 $\alpha$  kinase PERK inhibitor), salubrinal (an eIF2 $\alpha$  dephosphorylation inhibitor), everolimus (a mTOR inhibitor), and MHY1485 (a mTOR phosphorylation activator) (all from Selleck, Shanghai, China) were administered intraperitoneally in mice as follows: GSK2606414 (100 or 330  $\mu$ g/kg body weight) or everolimus (200 or 2,000  $\mu$ g/kg body weight) was injected daily in FD mice for 2 weeks. Salubrinal (100 or 330  $\mu$ g/kg body weight) or MHY1485 (66 or 200  $\mu$ g/kg body weight) were injected daily in normal mice for 2 weeks. Mice injected with 1% DMSO served as vehicle controls. Ocular refraction was measured before and after drug injections.

## scRNA-seq procedure

After 2 days of FD, the mice were euthanized by cervical dislocation, both eyes were enucleated and the sclera was isolated for single cell suspension preparation. As individual scleral tissues provided insufficient yields of cells, sclera from FD or control eyes of 6-8 mice were pooled and subsequently digested to obtain a single cell suspension. Briefly, the sclera was cut into small pieces and incubated in Dulbecco's modified Eagle's medium (DMEM) containing 0.15% (wt/vol) of type I collagenase (Sigma,) and 0.25% (wt/vol) of trypsin (Gibco) for 1 h in an incubator at 37°C containing 5% CO<sub>2</sub>. The solution was neutralized with 10% fetal calf serum and 0.02% ethylenediaminetetraacetic acid and filtered through a 35- $\mu$ m cell strainer (BD Biosciences) and the filtrate was collected. After washing and centrifuging, the single cells were re-suspended in DMEM at concentrations of  $1 \times 10^5$  to  $2 \times 10^5$  cells/ml.

54 An automated microfluidic platform (Fluidigm C1 System, Fluidigm) was used to  
55 capture and lyse individual scleral cells, reverse transcribe the RNA and amplify the  
56 resulting cDNA according to manufacturer's recommended protocol. Briefly, individual  
57 scleral cells were captured on a small-size (5-10  $\mu\text{m}$  cell diameter) microfluidic RNA-seq  
58 chip (C1™ Single-Cell Auto Prep IFC for mRNA, 100-5759, Fluidigm) using the Fluidigm  
59 C1 System. Cells were loaded onto the chip at a concentration of 60-180 cells/ $\mu\text{l}$  and  
60 imaged by a phase-contrast microscope to assess the number of cells per capture site.  
61 Only single cells were included in the analysis. The cDNA was then prepared on the chip  
62 using SMARTer Ultra Low RNA kit for Illumina (Clontech). After which, Qubit™ 1.0  
63 Fluorometer (Invitrogen, Life Technologies) was used to calculate the concentration of  
64 each sample and a 2100 Bioanalyzer (Agilent) evaluated the quality.

65 Single-cell libraries were constructed in 96-well plates using the Nextera XT DNA  
66 Sample Preparation Kit (Illumina) (6). For each Fluidigm C1 experiment, bulk tissue RNA  
67 controls containing thousands of cells were processed in parallel, using the same  
68 reagents as those used on the chip. Libraries were quantified with the Agilent Bioanalyzer,  
69 using a high sensitivity DNA analysis kit, and fluorometrically using Qubit dsDNA HS  
70 Assay kits and a Qubit™ 1.0 Fluorometer (Invitrogen, Life Technologies).

71 All RNA-seq libraries, including single cell and bulk scleral tissues were sequenced  
72 on Hiseq 4000 System (Illumina) with 150 bp pair-end reads. After obtaining the raw  
73 sequencing data, Cutadapt tool (version 1.8) was used to remove the Illumina adapters  
74 and the sequences from Clontech Universal Primer Mix and Clontech SMARTer  
75 Oligonucleotides that remained in sequencing samples during the amplification process  
76 (7). Sequencing reads less than 70 bp were removed from further analysis. The trimmed  
77 sequences were then aligned to the mouse reference cDNA (GRCm38.rel79.cdna) from  
78 Ensembl using the kallisto tool (version 0.42.4) with default parameters (8). The  
79 expression level of each transcript was estimated using the transcripts per million (TPM)  
80 method (9).

81 To find highly variable genes among all scleral fibroblasts, we fitted the squared  
82 coefficient of variation ( $CV^2$ ) as a function of the mean log transformed TPM with the  
83 parameterization  $CV^2 = \alpha_1/\mu + \gamma$ , where  $\mu$  was the average of TPM for each gene in all  
84 single-cells,  $\alpha_1$  and  $\gamma$  were the coefficients obtained by generalized linear model fitting (10).  
85 To minimize the skewing effect, genes with a mean TPM less than 1 were removed.  
86 Genes with an observed  $CV^2$  larger than the expected  $CV^2$  value calculated with the  
87 above function were considered to be highly variable.

88 We performed gene expression analysis of these highly variable genes. The  
89 differentially expressed genes (DEGs) were defined as those with a median TPM fold  
90 change of above 2 between the two scleral fibroblast populations, A1 and A2 (identified by  
91 hierarchical clustering of highly variable genes), and with a *P*-value (*t*-test) less than 0.05.  
92 We did not correct for multiple testing using the false discovery rate (FDR) as Rothman  
93 pointed out that "reducing the type I error for null associations increases the type II error  
94 for those associations that are not null...scientists should not be so reluctant to explore  
95 leads that may turn out to be wrong that they penalize themselves by missing possibly  
96 important findings" (11). Therefore, we adopted a relatively relaxed criterion that could  
97 outline more differentially expressed genes between the two distinct scleral cell  
98 populations. Given that ours was the first study to employ scRNA-seq to understand the  
99 mechanisms underlying myopia development, it was imperative that we made full use of  
100 the technology to avoid missing potentially important information. Besides, additional  
101 criteria for filtering the list of differentially expressed genes were in place to reduce the  
102 false positive rate. These included i) setting the median TPM among all cells to more than  
103 1, ii) setting the squared coefficient of variation larger than expected, and iii) setting the  
104 minimum fold change of median TPM to more than 2. We carried out pathway analysis  
105 (Ingenuity Pathway Analysis, Qiagen. <http://www.ingenuity.com/products/ipa>) on these  
106 genes, which were also filtered for *P*-value and z-score. The expression of eight genes in  
107 the top three signaling pathways were validated separately. Collectively, various cutoff  
108 thresholds were used as part of the bioinformatic analysis.

109 To identify enriched gene sets in bulk tissue RNA-seq relative to scRNA-seq data, the  
110 gene set enrichment analysis was performed using the GSEA v3.0 software (12).  
111 Hypergeometric Optimization of Motif Enrichment (HOMER v4.9) was used to determine  
112 transcription factors possibly targeting the differentially expressed genes (13).

113 To identify the relevance of gene expression data in animal models to those in  
114 humans, we investigated the genes in the highly significant pathways identified from  
115 scRNA-seq data with known candidate genes of human myopia. Databases such as the  
116 Genome-Wide Association Study catalog and ClinVar (14, 15) were queried using the  
117 keywords “Myopia” and “Refractive Error” to extract the risk genes of human myopia.  
118 Genes obtained from study populations with “high grade myopia” or “pathologic myopia”  
119 were defined as pathologic myopia risk genes. The protein-protein interaction (PPI) data  
120 were downloaded from BioGRID (<https://string-db.org/>), and only genes that had data on  
121 the PPI network were used for further analysis. We obtained 145 myopia risk genes and  
122 27 pathological myopia risk genes. A PPI network of myopia or pathologic myopia risk  
123 genes and those in the significant pathway from scRNA-seq was constructed through  
124 Cytoscape (<http://cytoscape.org>). Genes that interacted between these two datasets were  
125 shown in the network analysis. Enrichment analysis was done by hyper-geometric testing  
126 or 1,000 bootstrapping.

### 127 **RT-PCR Validation of DEGs in the highly significant signaling pathways**

128 After 2 days of FD, the murine scleral tissues (2 scleral tissues from mice were  
129 pooled together) were homogenized using a ball mill and total RNA was extracted with the  
130 RNeasy Fibrous Tissue Mini-kit (Qiagen) according to the manufacturer’s instructions.  
131 Total retinal RNA was extracted using TRIZOL™ reagent (Invitrogen). Scleral or retinal  
132 RNAs were subjected to reverse transcription with M-MLV Reverse Transcriptase  
133 (Promega) as previously described (16). The mRNA expression levels of 8 genes that  
134 were enriched in the top three signaling pathways (Table S4) were validated using  
135 RT-PCR (ABI 7500 Real-Time PCR System, Applied Biosystems), with specific primers  
136 (Table S8). The results were normalized to 18S rRNA.

### 137 **Western blot analysis**

138 After treatment, the scleras (4 scleral tissues from mice were pooled together) and  
139 retinas from mice or guinea pigs were separated and homogenized in radio  
140 immunoprecipitation assay (RIPA) lysis buffer (Beyotime, Shanghai, China) supplemented  
141 with 1 mM phenylmethanesulfonyl fluoride (PMSF) and Complete Mini (protease inhibitor  
142 cocktail). After centrifugation at 13,000xg for 10 min at 4°C, the supernatant was collected,  
143 and protein concentrations were determined using an Enhanced BCA Protein Assay Kit  
144 (Beyotime, Shanghai, China).

145 At the end of the designated periods, the cells were immediately placed on ice,  
146 washed with cold phosphate-buffered saline, and lysed with RIPA lysis buffer  
147 supplemented with 1 mM PMSF. The lysed cells were centrifuged at 13,000xg for 10 min  
148 at 4°C and the supernatant collected. The protein concentrations were determined using  
149 an Enhanced BCA Protein Assay Kit.

150 The expression levels of individual proteins were determined by western blot. Primary  
151 antibodies against collagen type I (1:1000, ab88147, Abcam),  $\alpha$ -SMA (1:250, ab5694,  
152 Abcam), HIF-1 $\alpha$  (1:800, 565924, BD Biosciences), eIF2 $\alpha$  and P-eIF2 $\alpha$  (1:800, 5324 and  
153 3398, Cell Signaling Technology), mTOR and P-mTOR (1:800, 2983 and 5536, Cell  
154 Signaling Technology), paxillin (1:500, ab32084, Abcam), vinculin (1:500, ab129002,  
155 Abcam),  $\alpha$ -tubulin (1.5:1000 for mice and 1:1000 for guinea pigs and cell culture, ab52866,  
156 Abcam), and  $\beta$ -actin (1:1250, A5441, Sigma) were used.

157 Densitometric analysis of the protein bands was conducted using Image J software  
158 (National Institutes of Health), and the values were normalized to the corresponding  
159 loading control,  $\beta$ -actin or  $\alpha$ -tubulin. All western blots shown were representative of at  
160 least three independent experiments.

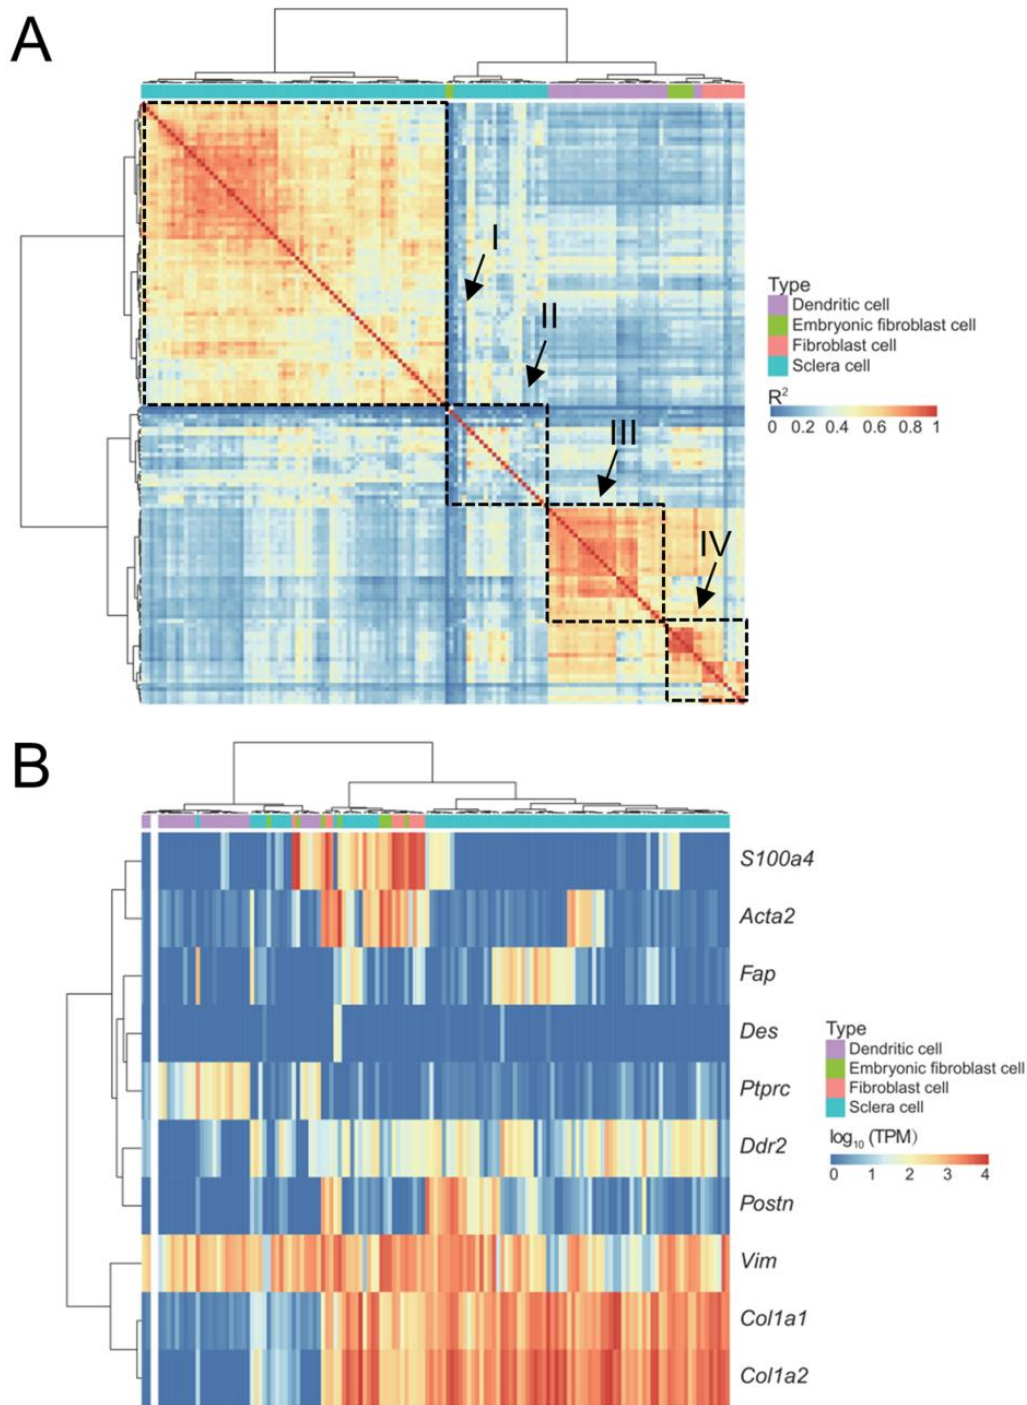

161

162 **Figure S1. Purification of single scleral fibroblasts. (A)** Unsupervised hierarchical  
 163 clustering for cell-cell pairwise correlation based on gene expression profiles from our  
 164 scleral single-cell data and the publicly available mouse scRNA-seq datasets (GSE60781  
 165 for dendritic cells, GSE47835 for embryonic fibroblasts, and GSE45719 for primary  
 166 cultured fibroblasts). Dotted line frames represented 4 clusters in which single cells had  
 167 similar profiles of correlation coefficients. The top-left axis represents single cells ordered  
 168 by hierarchical clustering. Color codes represent different cellular origins, and the color  
 169 scale represents  $R^2$  values for pairwise correlation coefficients. **(B)** Clustering of single  
 170 cells showing specific cellular markers. Nearly all fibroblasts highly expressed *Vim*,  
 171 *Col1a1*, and *Col1a2*. Dendritic cells highly expressed *Ptprc*, a leukocyte marker. Color  
 172 scale here represents  $\log_{10}$  - transformed transcripts per million (TPM) values for each  
 173 gene.

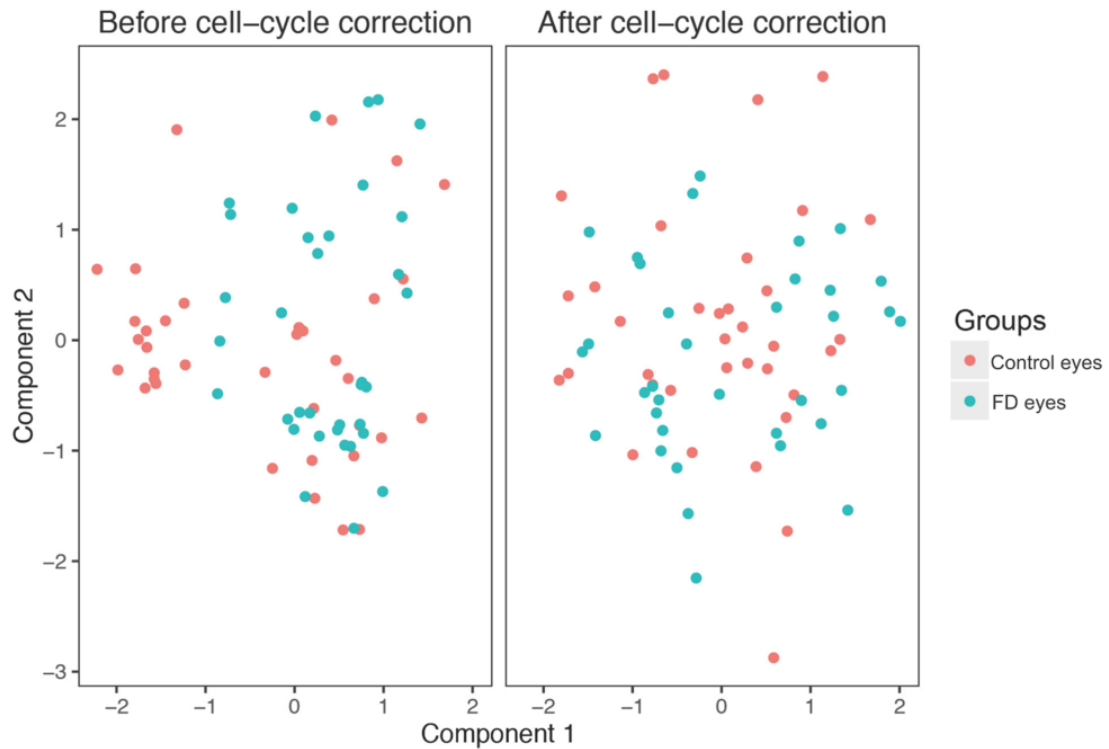

174

175 **Figure S2. Principal component analysis for the remaining 71 cells from our scleral**  
 176 **single-cells.** Each dot represents a single cell from the 71 cells. Cell cycle is a major  
 177 confounding factor that contributes to intercellular heterogeneity in scRNA-seq analyses.  
 178 To determine if cell cycle contributed to the sub-clustering, we used 892 cell-cycle related  
 179 genes to build a covariant matrix for normalizing the scRNA-seq data. We used principle  
 180 component analysis to identify subgroupings. The results showed that single cells from  
 181 form-deprived (blue dots) and their fellow control eyes (red dots) were randomly scattered.  
 182 No subgrouping was observed either before (left panel) or after (right panel) cell-cycle  
 183 adjustment. This indicates that cell cycle was not a major confounding factor in influencing  
 184 the results of scRNA-seq.

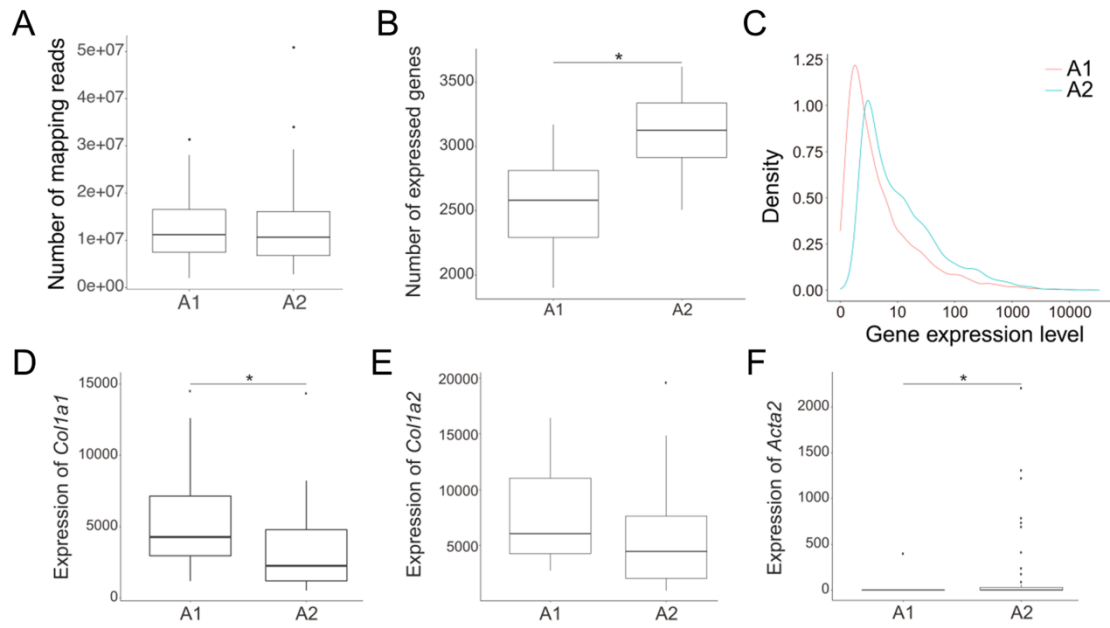

185

186 **Figure S3. Characteristics of two fibroblast subpopulations.** (A) Mapping reads, (B)  
 187 the number of expressed genes and (C) their gene expression levels between A1 and A2  
 188 subpopulations are presented here. (D), (E) and (F) show the levels of *Col1a1*, *Col1a2*,  
 189 and *Acta2* between the two subpopulations, respectively. Data are expressed as medians  
 190 (interquartile range), \* $P < 0.05$ , *t*-test.

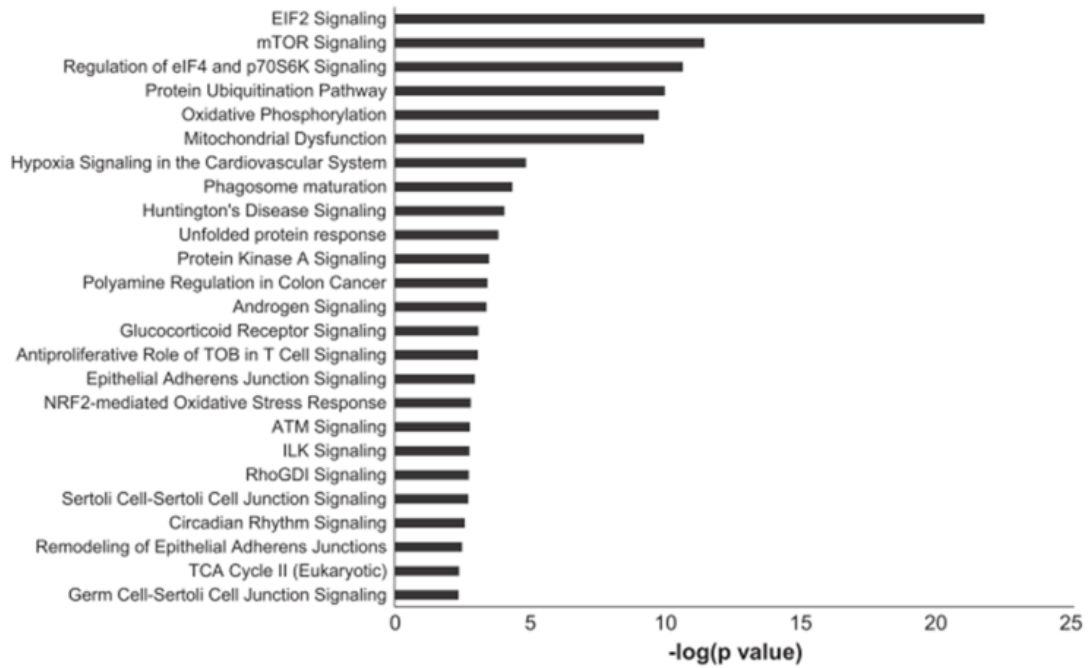

191

192 **Figure S4. Pathway enrichment analysis for the differentially expressed genes**  
 193 **between A1 and A2 subpopulations (A2 vs. A1).** The pathway analysis was carried out  
 194 using the Ingenuity Pathway Analysis tool, with an enrichment *P*-value cutoff of 0.01.



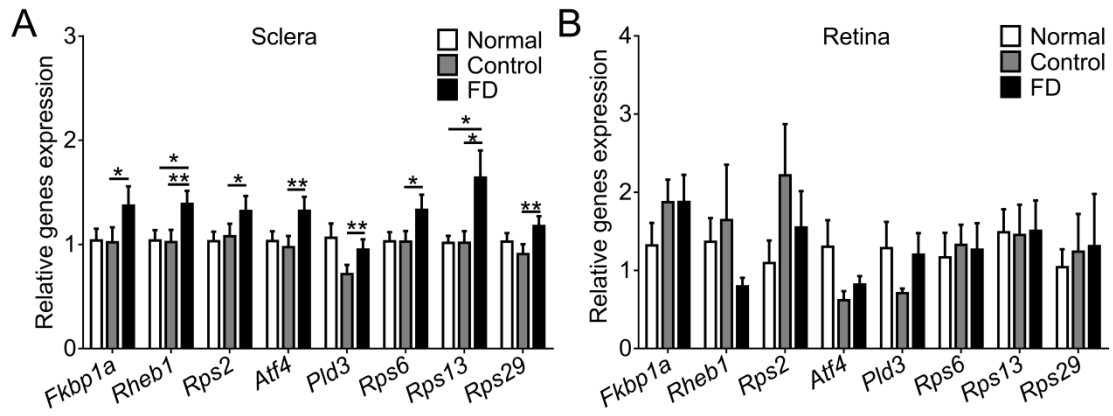

195

196

197

198

199

**Figure. S5. Validation of genes in hypoxia-related pathways in myopia in mice. (A-B):** Changes in mRNA levels of eight DEGs in the **(A)** sclera and **(B)** retina from mice after 2 days of FD (n=8). Data are expressed as mean  $\pm$  SEM. \*,  $P < 0.05$ , \*\*,  $P < 0.01$ ; Student's  $t$ -test.

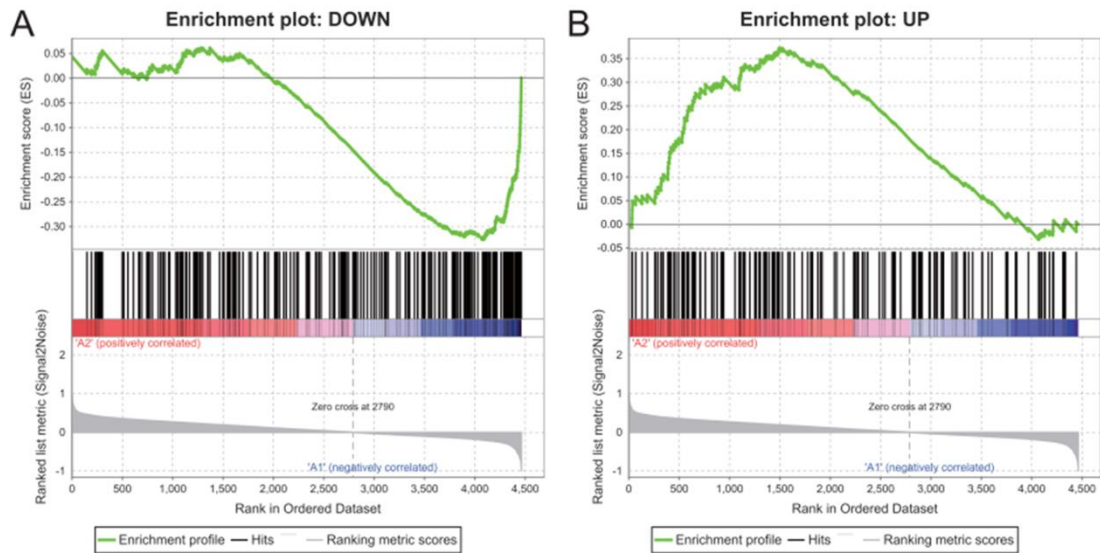

200

201

202

203

204

205

206

207

208

**Figure S6. Comparison of single-cell data with that from bulk tissue using Gene Set Enrichment Analysis.** For comparison of single-cell data with that of bulk tissue, we performed RNA-seq of the whole scleral tissue. **(A)** The 236 downregulated genes (FD vs. control) in scleral tissues were significantly enriched in the A1 gene set ( $P < 10^{-6}$ ). **(B)** On the other hand, the 150 upregulated genes in scleral tissues were enriched in the A2 gene set ( $P = 0.0035$ ). The higher enrichment scores indicate that the upregulated genes set tend to be highly expressed in the A2 population. The lower enrichment scores indicate the gene set tend to be highly expressed in the A1 population.

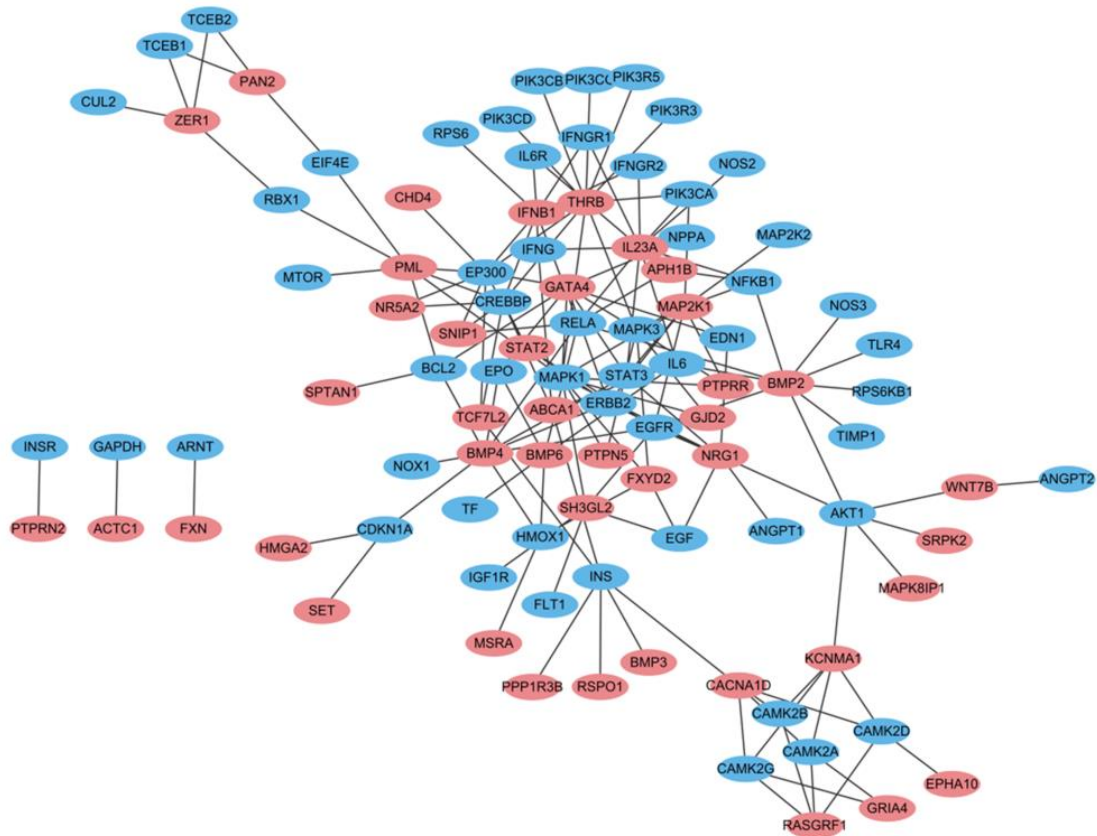

209

210 **Figure S7. Relationship between human myopia risk genes and genes in the HIF-1 $\alpha$**   
 211 **signaling pathway according to the PPI network.** Among the 45 risk genes (red ovals),  
 212 *THR*, *IL23A*, *BMP2*, *GATA4*, *MAP2K1*, and *BMP4*, each having 9 or more connections  
 213 with the genes in HIF-1 $\alpha$  signaling pathway (blue ovals), indicate strong interactions with  
 214 the hypoxia signaling pathway.

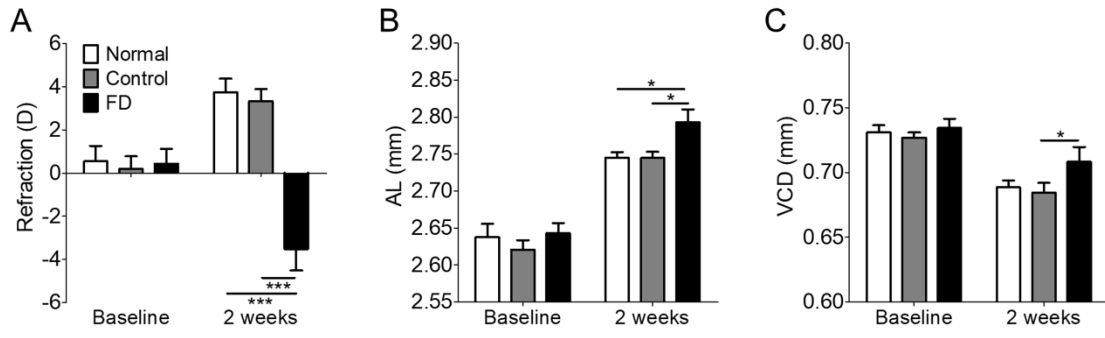

215  
 216  
 217  
 218  
 219  
 220

**Figure S8. Monocular form-deprivation (FD) in mice. (A)** refraction, **(B)** axial length (AL), and **(C)** vitreous chamber depth (VCD) from normal, control and FD eyes were measured at the baseline and 2 weeks after FD (n=16). Only right eyes from age-matched normal animals are shown. Data are expressed as mean  $\pm$  SEM. \* $P$ <0.05, \*\*\* $P$ <0.001, Student's  $t$ -test.

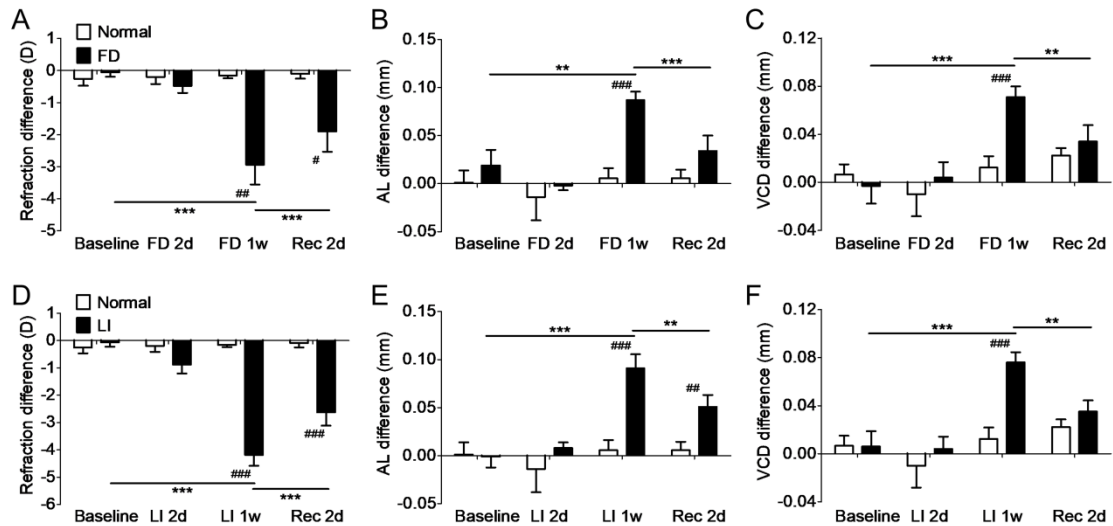

221

222

**Figure S9. Myopia induction (FD or negative-lens induction, LI) in guinea pigs.**

223

Interocular differences (FD or LI eye minus control eye or right eye minus left eye) in (A)

224

refraction, (B) axial length (AL), and (C) vitreous chamber depth (VCD) were repeatedly

225

measured at baseline, 2 days and 1 week after FD, and 2 days after recovery from 1 week

226

of FD. Interocular differences in (D) refraction, (E) AL, and (F) VCD were repeatedly

227

measured at baseline, 2 days and 1 week after LI, and 2 days after recovery from 1 week

228

of LI. FD and LI groups shared the same age-matched normal group (n=9-10). Five

229

guinea pigs from each group were measured at 2 days. Data are expressed as mean  $\pm$

230

SEM. \*\* $P < 0.01$ , \*\*\* $P < 0.001$  between two timepoints; # $P < 0.05$ , ## $P < 0.01$ , ### $P < 0.001$

231

between FD and normal groups or LI and normal groups; two-way repeated measures

232

ANOVA with Bonferroni multiple comparisons.

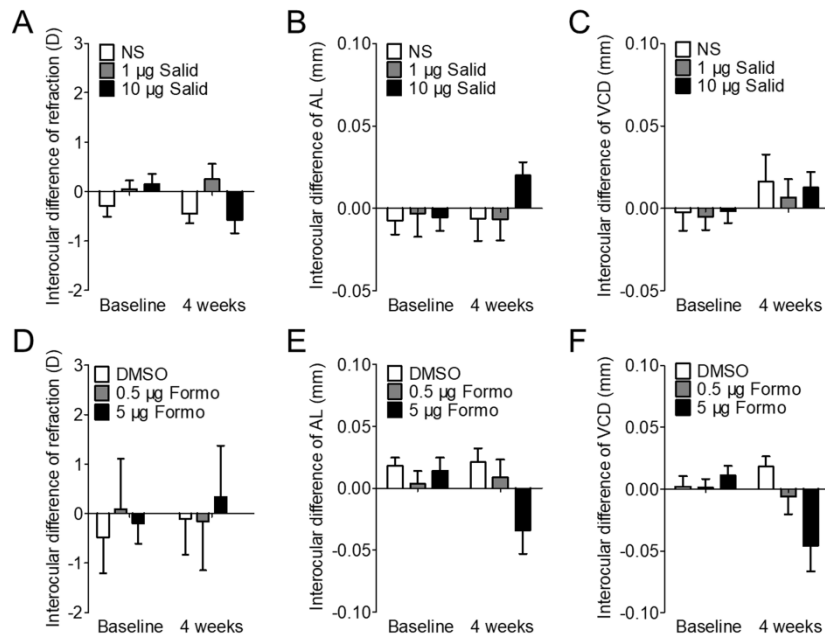

233

234 **Figure S10. Effect of periocular administration of anti-hypoxic drugs on myopia**  
 235 **development in normal guinea pigs.** Interocular differences in refraction (A), axial  
 236 length (B) and vitreous chamber depth (C) in normal guinea pigs before and after 4 weeks  
 237 of treatment with normal saline (NS, vehicle control, n=8), 1 µg per eye salidroside (Salid,  
 238 n=6), or 10 µg per eye Salid (n=11). Interocular differences in refraction (D), axial length  
 239 (E), vitreous chamber depth (F) in normal guinea pigs before and after 4 weeks of  
 240 treatment with 0.1% dimethyl sulfoxide (DMSO, vehicle control, n=10), 0.5 µg per eye  
 241 formononetin (Formo, n=8), or 5 µg per eye Formo (n=10). Interocular differences are  
 242 presented as injected eye minus fellow uninjected eye. Data are expressed as mean ±  
 243 SEM. \**P*<0.05, two-way repeated measures ANOVA with Bonferroni multiple comparisons.  
 244 D: diopter; AL: axial length; VCD: vitreous chamber depth.

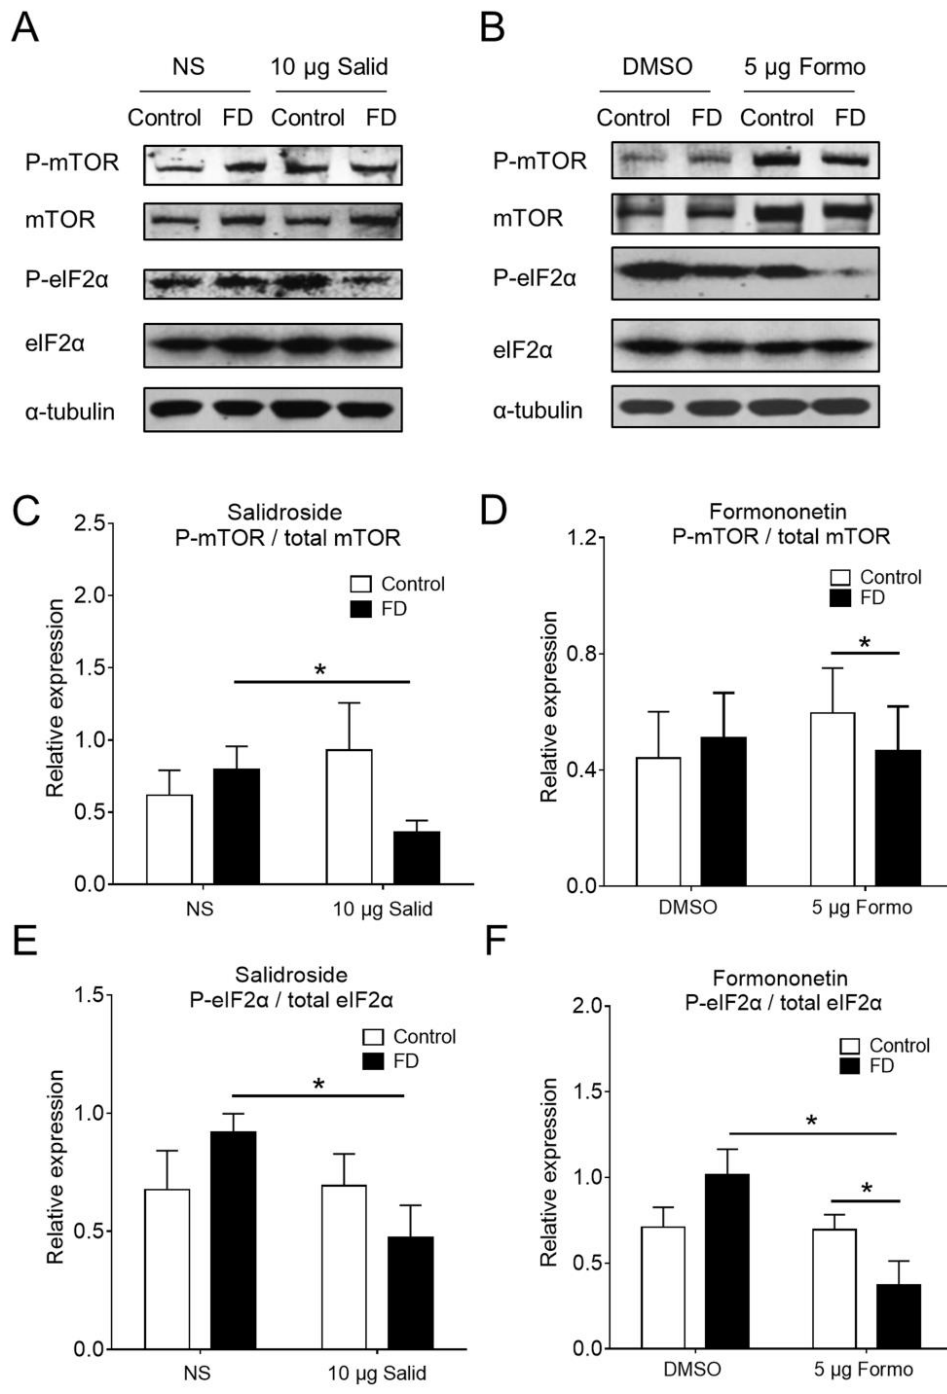

245

246 **Figure S11. Phosphorylation levels of eIF2α and mTOR after treatment of FD guinea**  
 247 **pigs with anti-hypoxic drugs.** Levels of P-mTOR, mTOR, P-eIF2α, and eIF2α in sclera  
 248 were detected by western blot after periocular injection of **(A)** 10 μg per eye salidroside  
 249 (Salid) or **(B)** 5 μg per eye formononetin (Formo) for 4 weeks. **(C)** Ratio of P-eIF2α/total  
 250 eIF2α after treatment with Salid (n=4). **(D)** Ratio of P-eIF2α/total eIF2α after treatment  
 251 with Formo (n=4). **(E)** Ratio of P-mTOR/total mTOR after treatment with Salid (n=4). **(F)**  
 252 Ratio of P-mTOR/total mTOR after treatment with Formo (n=4). Data are expressed as  
 253 mean ± SEM. \*, *P*<0.05, Student's *t*-test.

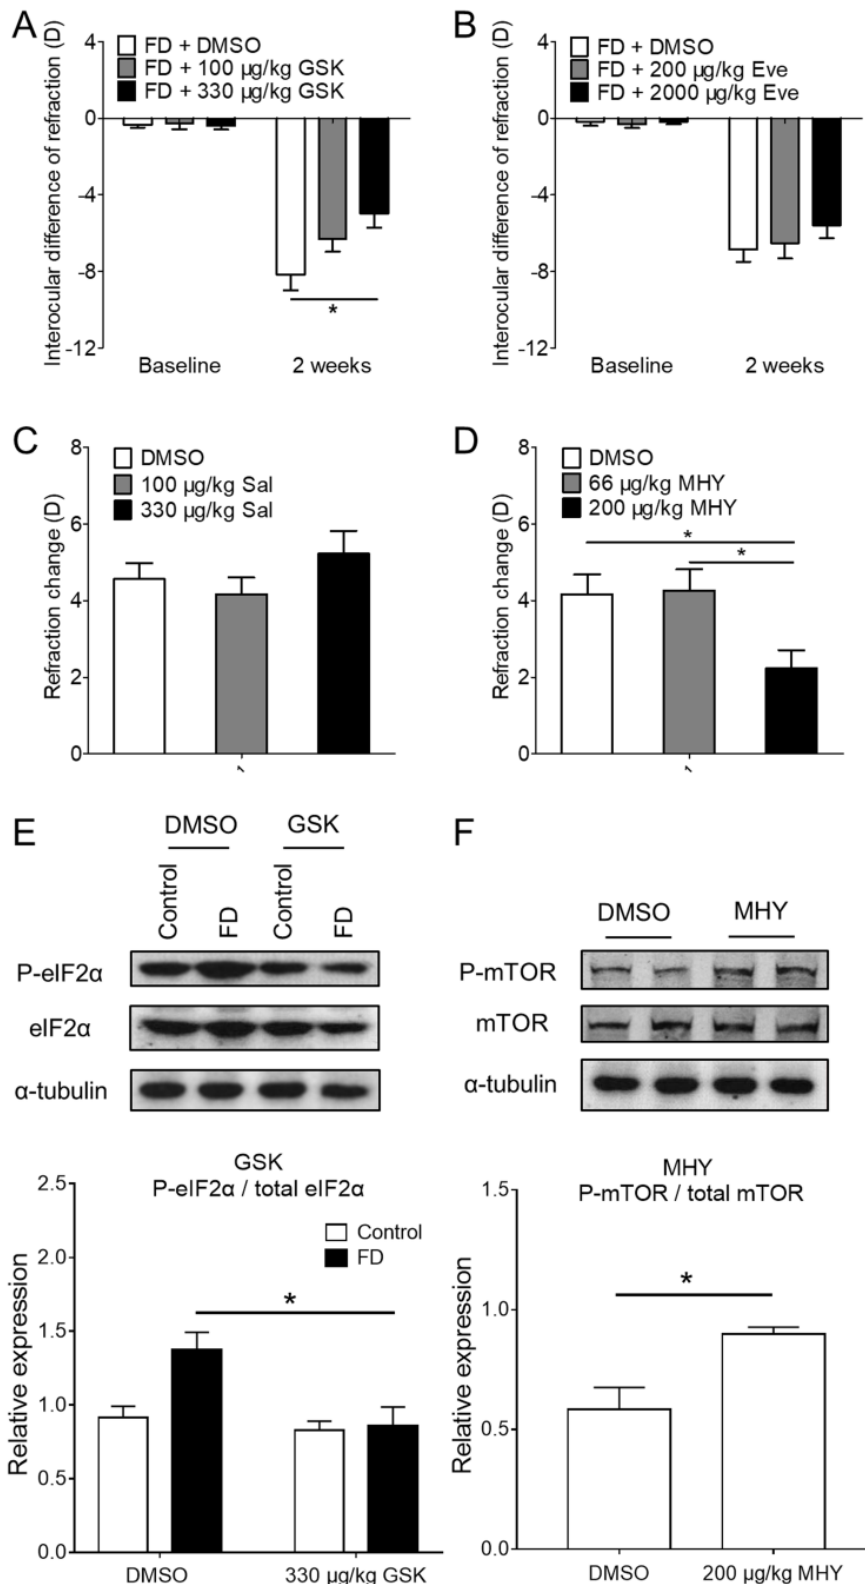

254

255 **Figure S12. Effect of inhibition and activation of eIF2 and mTOR on refraction in FD**  
 256 **mice. (A)** Interocular difference (FD eye minus control eye) in refraction before and after 2  
 257 weeks of daily intraperitoneal injection of 1% DMSO (vehicle control, n=18), 100  $\mu\text{g}/\text{kg}$   
 258 GSK2606414 (GSK, an eIF2 $\alpha$  phosphorylation inhibitor, n=22), or 330  $\mu\text{g}/\text{kg}$  body weight  
 259 GSK (n=26). **(B)** Interocular difference in refraction in FD mice before and after 2 weeks  
 260 of daily intraperitoneal injection of 1% DMSO (n=25), 200  $\mu\text{g}/\text{kg}$  everolimus (Eve, a mTOR  
 261 inhibitor, n=28), or 2,000  $\mu\text{g}/\text{kg}$  body weight Eve (n=23). \*,  $P < 0.05$ , two-way repeated



262 measures ANOVA with Bonferroni multiple comparison. **(C)** Refractive change  
263 (post-treatment minus pre-treatment) in normal mice after 2 weeks of daily intraperitoneal  
264 injection of 1% DMSO (n=24), 100 µg/Kg salubrinal (Sal, an eIF2α dephosphorylation  
265 inhibitor, n=25), or 330 µg/Kg body weight Sal (n=24). **(D)** Refractive change in normal  
266 mice after 2 weeks of daily intraperitoneal injection of with 1% DMSO (n=24), 66 µg/Kg  
267 MHY1485 (MHY, a mTOR phosphorylation activator, n=25), or 200 µg/Kg body weight  
268 MHY (n=26). Changes in the right eyes of normal mice only are shown. \*,  $P < 0.05$ ,  
269 one-way ANOVA with Bonferroni post hoc correction. **(E)** Ratios of P-eIF2α/total eIF2α in  
270 sclera after daily intraperitoneal injection with 330 µg/Kg GSK2606414 for 2 days (n=4). **(F)**  
271 Ratios of P-mTOR/total mTOR in sclera after daily intraperitoneal injection with 200 µg/Kg  
272 MHY for 2 days (n=4). Data are expressed as mean ± SEM. \*,  $P < 0.05$ , Student's *t*-test.

273 **Table S1.** Distribution of scleral single cells.

| Batch ID  | Total cells |    | Excluded cells |    | Percentage of excluded cells |     |
|-----------|-------------|----|----------------|----|------------------------------|-----|
|           | control     | FD | control        | FD | control                      | FD  |
| <b>b1</b> | 21          | 1  | 6              | 0  | 28%                          | 0%  |
| <b>b2</b> | 14          | 14 | 2              | 1  | 14%                          | 7%  |
| <b>b3</b> | 9           | 23 | 0              | 6  | 0%                           | 26% |
| <b>b4</b> | /           | 11 | /              | 7  | /                            | 63% |

274 The symbol “/” means that single cell capture was not performed with the control eye in  
 275 this batch.

**Table S2.** Quality of each single-cell RNA-sequencing data from our study.

| ID         | Remaining reads* | Mapped reads\$ | Mapping ratio | Exon ratio** | Cells used in analysis# |
|------------|------------------|----------------|---------------|--------------|-------------------------|
| 0109-F-C74 | 26,151,656       | 19,994,270     | 76.46%        | 76.85%       | yes                     |
| 0109-F-C91 | 23,019,146       | 17,402,210     | 75.60%        | 73.49%       | yes                     |
| 0109-F-C31 | 19,164,872       | 13,737,049     | 71.68%        | 75.72%       | yes                     |
| 1025-T-C37 | 17,723,838       | 12,562,108     | 70.88%        | 74.00%       | yes                     |
| 1025-F-C63 | 14,880,162       | 10,540,555     | 70.84%        | 74.18%       | yes                     |
| 1025-T-C95 | 39,500,046       | 27,706,090     | 70.14%        | 69.60%       | yes                     |
| 1025-F-C41 | 33,515,688       | 23,297,353     | 69.51%        | 70.26%       | yes                     |
| 0109-F-C45 | 45,147,582       | 31,339,899     | 69.42%        | 72.98%       | yes                     |
| 0110-F-C93 | 23,610,260       | 16,110,808     | 68.24%        | 80.03%       | yes                     |
| 0109-T-C59 | 2,952,550        | 1,996,328      | 67.61%        | 59.36%       | yes                     |
| 0109-F-C12 | 9,293,414        | 6,213,709      | 66.86%        | 81.30%       | yes                     |
| 1025-T-C66 | 24,353,036       | 16,047,342     | 65.89%        | 70.69%       | yes                     |
| 1025-T-C65 | 20,366,462       | 13,389,874     | 65.74%        | 64.87%       | yes                     |
| 0110-T-C50 | 15,653,046       | 10,195,156     | 65.13%        | 71.73%       | yes                     |
| 1025-T-C85 | 42,326,836       | 27,532,014     | 65.05%        | 61.63%       | yes                     |
| 1025-T-C92 | 36,758,732       | 23,861,642     | 64.91%        | 61.81%       | yes                     |
| 1025-F-C94 | 22,221,064       | 14,292,675     | 64.32%        | 67.58%       | yes                     |
| 1025-F-C45 | 53,153,576       | 33,973,862     | 63.92%        | 60.48%       | yes                     |
| 1025-T-C81 | 24,207,398       | 15,274,060     | 63.10%        | 61.18%       | yes                     |
| 0109-F-C11 | 22,499,012       | 14,148,305     | 62.88%        | 70.13%       | yes                     |
| 1025-T-C29 | 19,546,206       | 12,240,999     | 62.63%        | 59.41%       | yes                     |
| 0110-T-C89 | 10,071,854       | 6,181,640      | 61.38%        | 68.18%       | yes                     |
| 1025-T-C28 | 48,164,390       | 29,285,792     | 60.80%        | 56.40%       | yes                     |
| 1025-F-C44 | 83,923,458       | 50,849,947     | 60.59%        | 64.71%       | yes                     |
| 0110-T-C91 | 17,732,096       | 10,713,630     | 60.42%        | 69.46%       | yes                     |
| 0110-T-C84 | 16,921,870       | 10,216,761     | 60.38%        | 76.11%       | yes                     |
| 1106-T-C91 | 46,866,888       | 28,086,582     | 59.93%        | 63.42%       | yes                     |
| 1025-T-C25 | 17,823,214       | 10,650,253     | 59.75%        | 61.75%       | yes                     |
| 0110-F-C74 | 11,285,498       | 6,682,123      | 59.21%        | 72.57%       | yes                     |
| 1025-T-C59 | 43,047,438       | 25,476,406     | 59.18%        | 51.89%       | yes                     |
| 0109-F-C28 | 14,068,854       | 8,311,475      | 59.08%        | 61.34%       | yes                     |
| 0110-T-C49 | 9,295,690        | 5,475,088      | 58.90%        | 84.05%       | yes                     |
| 0110-T-C59 | 12,145,026       | 7,148,308      | 58.86%        | 67.77%       | yes                     |

|            |            |            |        |        |     |
|------------|------------|------------|--------|--------|-----|
| 0110-F-C90 | 8,717,550  | 5,124,588  | 58.78% | 77.27% | yes |
| 1025-F-C89 | 20,459,896 | 11,982,524 | 58.57% | 54.58% | yes |
| 1025-T-C60 | 21,479,022 | 12,562,643 | 58.49% | 53.42% | yes |
| 0110-F-C25 | 12,477,914 | 7,271,032  | 58.27% | 71.95% | yes |
| 1025-T-C93 | 42,874,602 | 24,945,260 | 58.18% | 57.46% | yes |
| 0109-F-C87 | 43,617,978 | 24,986,420 | 57.28% | 52.09% | yes |
| 1025-T-C17 | 34,075,954 | 19,369,097 | 56.84% | 49.87% | yes |
| 0109-F-C62 | 19,702,772 | 11,165,125 | 56.67% | 59.43% | yes |
| 0110-T-C93 | 13,492,440 | 7,642,426  | 56.64% | 66.58% | yes |
| 1025-T-C43 | 22,509,294 | 12,722,778 | 56.52% | 54.79% | yes |
| 1025-T-C73 | 38,468,118 | 21,665,469 | 56.32% | 49.58% | yes |
| 0109-F-C55 | 26,406,646 | 14,842,118 | 56.21% | 51.77% | yes |
| 0110-F-C51 | 19,118,242 | 10,719,071 | 56.07% | 63.30% | yes |
| 0110-F-C24 | 12,043,032 | 6,737,410  | 55.94% | 65.89% | yes |
| 0109-F-C18 | 18,234,058 | 10,131,581 | 55.56% | 51.97% | yes |
| 0109-F-C92 | 9,087,064  | 5,031,180  | 55.37% | 53.87% | yes |
| 0110-T-C77 | 10,128,554 | 5,586,662  | 55.16% | 64.16% | yes |
| 1025-F-C81 | 20,494,104 | 11,300,064 | 55.14% | 52.47% | yes |
| 0110-T-C64 | 13,884,664 | 7,641,870  | 55.04% | 70.45% | yes |
| 1025-F-C48 | 19,348,418 | 10,623,552 | 54.91% | 53.08% | yes |
| 1025-T-C89 | 18,455,636 | 10,093,667 | 54.69% | 50.13% | yes |
| 1025-F-C61 | 48,621,686 | 26,506,110 | 54.51% | 47.67% | yes |
| 0109-F-C36 | 14,462,918 | 7,854,676  | 54.31% | 52.05% | yes |
| 0110-F-C40 | 9,529,974  | 5,140,237  | 53.94% | 67.66% | yes |
| 0109-F-C78 | 8,894,854  | 4,795,644  | 53.91% | 47.65% | yes |
| 0110-F-C59 | 16,467,034 | 8,858,212  | 53.79% | 60.72% | yes |
| 0110-F-C95 | 12,874,224 | 6,777,994  | 52.65% | 67.76% | yes |
| 1106-T-C79 | 21,411,022 | 11,212,202 | 52.37% | 49.28% | yes |
| 0110-F-C78 | 12,115,222 | 5,974,958  | 49.32% | 69.85% | yes |
| 0110-T-C57 | 7,457,826  | 3,671,233  | 49.23% | 58.70% | yes |
| 0110-T-C47 | 16,006,912 | 7,797,024  | 48.71% | 61.93% | yes |
| 0109-F-C58 | 34,104,262 | 16,233,899 | 47.60% | 43.28% | yes |
| 0110-F-C83 | 8,018,504  | 3,794,107  | 47.32% | 59.26% | yes |
| 0110-T-C18 | 10,609,368 | 5,016,841  | 47.29% | 79.17% | yes |
| 1106-T-C82 | 18,727,540 | 8,699,742  | 46.45% | 41.55% | yes |
| 0110-T-C33 | 6,124,948  | 2,791,233  | 45.57% | 66.51% | yes |
| 0110-F-C68 | 15,105,804 | 6,652,828  | 44.04% | 71.72% | yes |
| 1106-T-C73 | 12,685,740 | 5,312,410  | 41.88% | 36.90% | yes |

|            |            |            |        |        |    |
|------------|------------|------------|--------|--------|----|
| 0109-F-C04 | 15,102,110 | 9,304,711  | 61.61% | 58.84% | no |
| 0109-F-C13 | 44,739,882 | 21,914,286 | 48.98% | 41.64% | no |
| 0109-F-C47 | 50,836,828 | 27,699,873 | 54.49% | 45.91% | no |
| 0109-F-C52 | 10,961,894 | 5,730,116  | 52.27% | 51.27% | no |
| 0109-F-C60 | 16,926,110 | 9,266,806  | 54.75% | 56.89% | no |
| 0109-F-C84 | 11,209,024 | 6,690,255  | 59.69% | 61.45% | no |
| 0110-F-C73 | 7,214,854  | 3,137,726  | 43.49% | 51.86% | no |
| 0110-F-C75 | 15,286,456 | 9,000,623  | 58.88% | 73.23% | no |
| 0110-T-C51 | 10,172,096 | 6,364,279  | 62.57% | 98.38% | no |
| 1025-T-C21 | 15,177,962 | 8,099,388  | 53.36% | 44.60% | no |
| 1025-T-C46 | 31,149,404 | 12,484,143 | 40.08% | 43.69% | no |
| 1025-T-C52 | 44,477,796 | 19,371,530 | 43.55% | 41.48% | no |
| 1025-T-C55 | 11,107,296 | 5,165,638  | 46.51% | 51.18% | no |
| 1025-T-C71 | 18,422,898 | 8,211,983  | 44.57% | 36.47% | no |
| 1025-T-C79 | 26,636,604 | 14,196,889 | 53.30% | 44.72% | no |
| 1106-T-C19 | 28,563,520 | 13,340,813 | 46.71% | 41.41% | no |
| 1106-T-C26 | 32,088,568 | 20,966,558 | 65.34% | 69.16% | no |
| 1106-T-C39 | 16,528,864 | 5,679,423  | 34.36% | 28.99% | no |
| 1106-T-C77 | 19,680,120 | 9,558,239  | 48.57% | 48.03% | no |
| 1106-T-C83 | 24,701,168 | 10,782,764 | 43.65% | 41.03% | no |
| 1106-T-C94 | 21,095,206 | 8,819,072  | 41.81% | 38.68% | no |
| 1106-T-C96 | 14,146,208 | 5,655,085  | 39.98% | 35.52% | no |

277 “-T-” and “-F-” in ID column represent “FD eye” and “fellow control eye” respectively from  
278 the sclera of monocular FD mice.

279 \* Remaining reads after adapter trimming and primer cutting;

280 \$ Reads mapped to GRCm38.rel79.cdna;

281 \*\* Ratio of exon reads based on mapping to mouse reference genome GRCm38 by STAR;

282 # The 71 cells used in subgrouping analysis.

**Table S3.** Single-cells from Gene Expression Omnibus (GEO) datasets.

| <b>GEO dataset</b> | <b>Sample</b>     | <b>Run</b> |
|--------------------|-------------------|------------|
| GSE60781           | CDP_1             | SRR1558744 |
| GSE60781           | CDP_2             | SRR1558745 |
| GSE60781           | CDP_3             | SRR1558746 |
| GSE60781           | CDP_4             | SRR1558747 |
| GSE60781           | CDP_5             | SRR1558748 |
| GSE60781           | CDP_6             | SRR1558749 |
| GSE60781           | CDP_7             | SRR1558750 |
| GSE60781           | CDP_8             | SRR1558751 |
| GSE60781           | CDP_9             | SRR1558752 |
| GSE60781           | CDP_10            | SRR1558753 |
| GSE60781           | PreDC_1           | SRR1558840 |
| GSE60781           | PreDC_2           | SRR1558841 |
| GSE60781           | PreDC_3           | SRR1558842 |
| GSE60781           | PreDC_4           | SRR1558843 |
| GSE60781           | PreDC_5           | SRR1558844 |
| GSE60781           | PreDC_6           | SRR1558845 |
| GSE60781           | PreDC_7           | SRR1558846 |
| GSE60781           | PreDC_8           | SRR1558847 |
| GSE60781           | PreDC_9           | SRR1558848 |
| GSE60781           | PreDC_10          | SRR1558849 |
| GSE60781           | MDP_1             | SRR1558936 |
| GSE60781           | MDP_2             | SRR1558937 |
| GSE60781           | MDP_3             | SRR1558938 |
| GSE60781           | MDP_4             | SRR1558939 |
| GSE60781           | MDP_5             | SRR1558940 |
| GSE60781           | MDP_6             | SRR1558941 |
| GSE60781           | MDP_7             | SRR1558942 |
| GSE60781           | MDP_8             | SRR1558943 |
| GSE60781           | MDP_9             | SRR1558944 |
| GSE60781           | MDP_10            | SRR1558945 |
| GSE45719           | fibroblast_13_CxB | SRR1041755 |
| GSE45719           | fibroblast_14_CxB | SRR1041756 |
| GSE45719           | fibroblast_15_CxB | SRR1041757 |
| GSE45719           | fibroblast_16_CxB | SRR1041758 |
| GSE45719           | fibroblast_17_BxC | SRR1041759 |
| GSE45719           | fibroblast_19_BxC | SRR1041760 |

|          |                   |            |
|----------|-------------------|------------|
| GSE45719 | fibroblast_20_BxC | SRR1041761 |
| GSE45719 | fibroblast_21_BxC | SRR1041762 |
| GSE45719 | fibroblast_22_BxC | SRR1041763 |
| GSE45719 | fibroblast_9_CxB  | SRR1041764 |
| GSE47835 | MEF1              | SRR1267517 |
| GSE47835 | MEF2              | SRR1267518 |
| GSE47835 | MEF3              | SRR1267519 |
| GSE47835 | MEF4              | SRR1267520 |
| GSE47835 | MEF5              | SRR1267521 |
| GSE47835 | MEF6              | SRR1267522 |
| GSE47835 | MEF7              | SRR1267523 |
| GSE47835 | MEF8              | SRR1267524 |

---

285 **Table S4.** Differentially expressed genes enriched in the top three hypoxia-related  
 286 signaling pathways.

| Signaling pathway                              | Genes                                                                                                                                                                                                                                                                                                           |
|------------------------------------------------|-----------------------------------------------------------------------------------------------------------------------------------------------------------------------------------------------------------------------------------------------------------------------------------------------------------------|
| EIF2 signaling                                 | <i>Rpl24, Rpl22, Rps23, Rpl35a, Rpl7a, Rps11, Rps28, Rps20, Eif4g2, Rpl13, <b>Rps13</b>, Rps9, Rpl19, <b>Rps2</b>, Rps3, Rps5, Rpl31, Rpl18, Pabpc1, Rps19, Rpl3, Rpl17, Rps10, Rps21, <b>Rps29</b>, Rpl28, Eif3m, Fau, <b>Rps6</b>, Rpl15, Rpl27, Rps26, Rps27a, Rpl37, Rps25, Rps15a, Eif3l, Rps14, Rplp0</i> |
| mTOR signaling                                 | <i>Rps23, <b>Fkbp1a</b>, Rps11, Rps28, Rps20, Eif4g2, <b>Rps13</b>, Rps9, <b>Rps2</b>, Rps5, Rps3, Rps19, <b>Rheb</b>, <b>Pld3</b>, Rps10, Rhoj, Rps21, <b>Rps29</b>, Fau, Eif3m, <b>Rps6</b>, Rnd3, Rps26, Rps27a, Rps25, Rps15a, Eif3l, Rps14</i>                                                             |
| Hypoxia signaling in the cardiovascular system | <i>Ube2l3, Jun, Nfkbia, Hsp90ab1, Sumo1, Creb3, Ube2v1, <b>Atf4</b>, Ube2l6, Ube2f</i>                                                                                                                                                                                                                          |

287 The genes listed underwent a significant change in expression patterns in transitioning  
 288 from the A1 to A2 subpopulations (*t*-tests with  $P < 0.05$  and fold change of median TPM > 2  
 289 or < 0.5). The genes in bold font were validated at the bulk tissue level by RT-PCR.



**Table S5.** Potential transcription factors involved in A1 to A2 transition.

| Motif                                                                               | P-value | Best Match                                                         |
|-------------------------------------------------------------------------------------|---------|--------------------------------------------------------------------|
|    | 1e-12   | Tlx?(NR)/NPC-H3K4me1-ChIP-Seq (GSE16256)/Homer(0.698)              |
|    | 1e-12   | RUNX1(Runt)/Jurkat-RUNX1-ChIP-Seq(GSE29180)/Homer(0.605)           |
|    | 1e-12   | NFY(CCAAT)/Promoter/Homer(0.651)                                   |
|    | 1e-11   | Srebp1a(bHLH)/HepG2-Srebp1a-ChIP-Seq(GSE31477)/Homer(0.608)        |
|   | 1e-11   | Bapx1(Homeobox)/VertebralCol-Bapx1-ChIP-Seq(GSE36672)/Homer(0.597) |
|  | 1e-10   | Znf263(Zf)/K562-Znf263-ChIP-Seq (GSE31477)/Homer(0.634)            |
|  | 1e-10   | Crx/MA0467.1/Jaspar(0.620)                                         |
|  | 1e-10   | BMXB(HTH)/Hela-BMYB-ChIP-Seq (GSE27030)/Homer(0.676)               |
|  | 1e-10   | Smad4(MAD)/ESC-SMAD4-ChIP-Seq (GSE29422)/Homer(0.723)              |
|  | 1e-10   | Foxh1(Forkhead)/hESC-FOXH1-ChIP-Seq(GSE29422)/Homer(0.706)         |

---

|                                                                                     |      |                                                               |
|-------------------------------------------------------------------------------------|------|---------------------------------------------------------------|
|    | 1e-9 | E2F6/MA0471.1/Jaspar(0.619)                                   |
|    | 1e-9 | E2F6(E2F)/Hela-E2F6-ChIP-Seq<br>(GSE31477)/Homer(0.681)       |
|    | 1e-9 | n-Myc(bHLH)/mES-nMyc-ChIP-Seq<br>(GSE11431)/Homer(0.808)      |
|    | 1e-9 | REST/MA0138.2/Jaspar(0.580)                                   |
|    | 1e-9 | LIN54/MA0619.1/Jaspar(0.717)                                  |
|   | 1e-9 | PB0127.1_Gata6_2/Jaspar(0.599)                                |
|  | 1e-8 | Sox5/MA0087.1/Jaspar(0.872)                                   |
|  | 1e-8 | NFY(CCAAT)/Promoter/Homer(0.791)                              |
|  | 1e-8 | COUP-TFII(NR)/Artia-Nr2f2-ChIP-Seq<br>(GSE46497)/Homer(0.655) |
|  | 1e-8 | Sox2/MA0143.3/Jaspar(0.720)                                   |
|  | 1e-8 | PB0139.1_Irf5_2/Jaspar(0.651)                                 |
|  | 1e-8 | ESRRB/MA0141.3/Jaspar(0.597)                                  |

---

|  |      |                                                         |
|--|------|---------------------------------------------------------|
|  | 1e-8 | RUNX2(Runt)/PCa-RUNX2-ChIP-Seq(GSE33889)/Homer(0.639)   |
|  | 1e-8 | PB0179.1_Sp100_2/Jaspar(0.593)                          |
|  | 1e-8 | Hoxa9/MA0594.1/Jaspar(0.621)                            |
|  | 1e-8 | Ahr::Arnt/MA0006.1/Jaspar(0.671)                        |
|  | 1e-8 | PB0124.1_Gabpa_2/Jaspar(0.675)                          |
|  | 1e-8 | PB0194.1_Zbtb12_2/Jaspar(0.702)                         |
|  | 1e-8 | GLIS1/MA0735.1/Jaspar(0.636)                            |
|  | 1e-8 | HIF-1a(bHLH)/MCF7-HIF1a-ChIP-Seq(GSE28352)/Homer(0.817) |
|  | 1e-7 | PB0179.1_Sp100_2/Jaspar(0.669)                          |
|  | 1e-7 | PB0134.1_Hnf4a_2/Jaspar(0.689)                          |
|  | 1e-7 | PB0156.1_Plagl1_2/Jaspar(0.558)                         |

---

|                                                                                   |      |                                                              |
|-----------------------------------------------------------------------------------|------|--------------------------------------------------------------|
|  | 1e-5 | ZNF189(Zf)/HEK293-ZNF189.GFP-ChIP-Seq(GSE58341)/Homer(0.597) |
|  | 1e-5 | Sox17/MA0078.1/Jaspar(0.677)                                 |
|  | 1e-4 | Nr2e3/MA0164.1/Jaspar(0.705)                                 |

---

291 Potential transcription factors of the differentially expressed genes (DEGs) were identified  
292 by analyzing the promoter sequences. Overrepresented sequence motifs were extracted  
293 and used to perform hypergeometric distribution tests.

294 Motif: overrepresented sequences in the promoter of DEGs.

295 P-value: significant level for hypergeometric test. Transcription factors with enrichment  
296  $P < 1e-4$  are listed.

297 Best Match: transcription factors binding to the motif.

298 **Table S6.** Risk genes of human myopia and pathologic myopia.

| Catalogue         | Risk genes                                                                                                                                                                                                                                                                                                                                                                                                                                                                                                                                                                                                                                                                                                                                                                                                                                                                                                                                                                                                                                                                 |
|-------------------|----------------------------------------------------------------------------------------------------------------------------------------------------------------------------------------------------------------------------------------------------------------------------------------------------------------------------------------------------------------------------------------------------------------------------------------------------------------------------------------------------------------------------------------------------------------------------------------------------------------------------------------------------------------------------------------------------------------------------------------------------------------------------------------------------------------------------------------------------------------------------------------------------------------------------------------------------------------------------------------------------------------------------------------------------------------------------|
| Myopia            | <i>BRF2, CYP26A1, IL23A, GNB3, MAPK8IP1, PEX16, COL10A1, KCNJ2, BMP4, SLC14A2, RDH5, MIP, PGBD1, FXYD6, SIX3, COL8A1, PZP, APH1B, VIPR2, DNAH9, ASPA, HAT1, ZIC5, PML, NUF2, CAPN9, ERLIN2, LRRC4C, GRIA4, BMP3, BMP6, PTPRR, MYO5B, PDE11A, PCDH1, CACNA1D, IL17RB, GJD2, ACTC1, ZER1, PKN3, FXYD2, ZNF281, ALPPL2, SNIP1, DNALI1, LRFN5, CPSF2, MAP2K1, ANTXR2, CTNND2, PPP1R3B, GPD2, GLE1, RBFOX1, GLS2, SLC35C1, MSRA, CA8, METAP1D, DSCAML1, STAT2, CDCA8, CD55, CHDH, DIS3L, MYO1D, FBN1, CNDP2, NT5DC1, SIX6, RAB11FIP1, NPLOC4, GATA4, CDKN3, DHX15, ACTR8, WNT7B, TNFSF13, KCNQ5, FILIP1L, THRB, RSPO1, SPTBN1, NRG1, CHD4, SEMA4F, PTPN5, GK2, RGR, TOX, COL6A1, NR5A2, NFIA, SET, WDR34, SPTAN1, EPHA10, GNL2, DENND1A, BICC1, FRMPD2, ABCA1, DLG2, PCCA, ZIC2, RORB, FXN, CAMKMT, BMP2, IFNB1, ADAMTSL1, SH3GL2, NLN, MIPEP, PTPRN2, CHRNG, SRPK2, TFAP2B, TBC1D23, APOF, PCBP3, HMGA2, NRXN1, KCNMA1, SHISA6, CHD7, PHF21A, LAMA2, PAN2, ZNF469, CLSTN2, PBX1, RASGRF1, GABRR1, OR4A47, STIM2, SELK, STAU2, TJP2, PDE10A, PCDH7, TCF7L2, TIMELESS, BLID.</i> |
| Pathologic myopia | <i>PHA42, SCO2, VIPR2, DNAH9, ASPA, SLC39A5, PML, CAPN9, BMP6, PCDH1, NCAPH2, CTNND2, PPP1R3B, PRIMPOL, MSRA, GATA4, DHX15, SPTBN1, CHD4, SEMA4F, DENND1A, ABCA1, MIPEP, PTPRN2, SRPK2, CLSTN2, LRPAP1.</i>                                                                                                                                                                                                                                                                                                                                                                                                                                                                                                                                                                                                                                                                                                                                                                                                                                                                |

299

300  
301

**Table S7.** Differentially expressed genes (DEGs) that interact with risk genes of human myopia.

| Catalogue                            | DEGs                                                                                                                                                                                                                                                                                                                                                                                                                                                                                                                                                                                                                                                                                                                                                                                                                                   |
|--------------------------------------|----------------------------------------------------------------------------------------------------------------------------------------------------------------------------------------------------------------------------------------------------------------------------------------------------------------------------------------------------------------------------------------------------------------------------------------------------------------------------------------------------------------------------------------------------------------------------------------------------------------------------------------------------------------------------------------------------------------------------------------------------------------------------------------------------------------------------------------|
| With risk genes of myopia            | <p><i>Abat, Acin1, Acta2, Actn1, Actn4, Ap2s1, Apc, Ap1p2, Apoe, Arglu1, Ash2l, Atf3, Atp1b3, Atrx, Bhlhe40, Bhlhe41, Cct2, Cct4, Cfl1, Ckap5, Cpsf6, Ctcf, Cthrc1, Cul1, Eps15, Fkbp1a, Fzd7, Glul, Gnai3, Gng12, Gps2, H2afv, Hbp1, Hnrnpf, Hnrnp1, Hsp90ab1, Hspa2, Hspa8, Hspa9, Ilk, Ing3, Ipo4, Itgb5, Jak1, Jun, Kcnma1, Klhl9, Kpna1, Lepr, Magoh, Map2k3, Med13, Mef2a, Mfap5, Mier1, Msrb3, Ndufb7, Nedd8, Nfe2l2, Nfkb1a, Nop58, Npr2, Nr1d1, Nudc, Pabpc1, Papola, Pcbp1, Pdna, Per3, Pld3, Pls3, Plxnb2, Polr1d, Polr2f, Prkar1a, Ptp1b, Rap1a, Rbx1, Rpl23a, Rpl3, Rps27a, Rps6, Rqcd1, Sdhb, Sec11a, Sec13, Selm, Sfrp2, Sirt1, Skiv2l2, Slu7, Smad3, Smad4, Smc4, Snrpd1, Snw1, Spcs2, Sptan1, Srsf9, Ssrp1, Stx12, Sumo1, Synj1, Tagln2, Tcf4, Tgif1, Timp1, Tuba1a, Ubc, Vmp1, Wls, Xaf1, Xbp1, Zeb1, Zfhx4.</i></p> |
| With risk genes of pathologic myopia | <p><i>Acin1, Actn1, Actn4, Apoe, Arglu1, Atrx, Cox11, Fkbp1a, Glul, Ilk, Jun, Magoh, Mef2a, Msrb3, Nop58, Pabpc1, Plxnb2, Polr1d, Rap1a, Rbx1, Sec11a, Sirt1, Skiv2l2, Slu7, Smad3, Smad4, Smc4, Snw1, Spcs2, Sptan1, Srsf9, Ssrp1, Stx12, Sumo1, Surf1, Tgif1, Tuba1a, Ubc, Zeb1, Zfhx4.</i></p>                                                                                                                                                                                                                                                                                                                                                                                                                                                                                                                                      |

302

303 **Table S8.** Real-time PCR primers used in this study.

| <b>Target</b>   | <b>Forward primer</b>  | <b>Backward primer</b>  |
|-----------------|------------------------|-------------------------|
| <i>18s rRNA</i> | CGGACACGGACAGGATTGAC   | TGCCAGAGTCTCGTTCGTTATC  |
| <i>Fkbp1a</i>   | GATTCCTCTCGGGACAGAAACA | GACCCACACTCATCTGGGCTA   |
| <i>Rheb1</i>    | GGTCTGTGGGAAAGTCCTCAT  | GGTGAACGTGTTCTCTATGGTT  |
| <i>Rps2</i>     | GGGGCTCGTGGAGGTAAAG    | TCTCAGACTCCTTAATGGGCAG  |
| <i>Atf4</i>     | CCTGAACAGCGAAGTGTTGG   | TGGAGAACCCATGAGGTTTCAA  |
| <i>Pld3</i>     | AAGCCCAAAGTGTACCAG     | CCTTCCATGCCTCGATTTTATT  |
| <i>Rps6</i>     | AAGAGTGGAAGGGTTATGTGGT | GGTCAGAACACCTTGCTTCAT   |
| <i>Rps13</i>    | TCCCTCCAGATAGGTGTAATCC | TCCTTTCTGTTCCCTCTCAAGGT |
| <i>Rps29</i>    | GTCTGATCCGCAAATACGGG   | AGCCTATGTCCTTCGCGTACT   |

304

305 **References**

- 306 1. Schaeffel F, Burkhardt E, Howland HC, Williams RW (2004) Measurement of  
307 refractive state and deprivation myopia in two strains of mice. *Optom Vis Sci*  
308 81(2):99-110.
- 309 2. Zhou X, et al. (2008) Biometric measurement of the mouse eye using optical  
310 coherence tomography with focal plane advancement. *Vision Res*  
311 48(9):1137-1143.
- 312 3. Lu F, et al. (2006) Axial myopia induced by a monocularly-deprived facemask in  
313 guinea pigs: A non-invasive and effective model. *Exp Eye Res* 82(4):628-636.
- 314 4. Lu F, et al. (2009) Axial myopia induced by hyperopic defocus in guinea pigs: A  
315 detailed assessment on susceptibility and recovery. *Exp Eye Res* 89(1):101-108.
- 316 5. Jiang L, et al. (2009) Spontaneous axial myopia and emmetropization in a strain of  
317 wild-type guinea pig (*Cavia porcellus*). *Invest Ophthalmol Vis Sci*  
318 50(3):1013-1019.
- 319 6. Wu AR, et al. (2014) Quantitative assessment of single-cell RNA-sequencing  
320 methods. *Nat Methods* 11(1):41-46.
- 321 7. Martin M (2011) Cutadapt removes adapter sequences from high-throughput  
322 sequencing reads. *EMBnet. journal* 17(1):pp. 10-12.
- 323 8. Bray NL, Pimentel H, Melsted P, Pachter L (2016) Near-optimal probabilistic  
324 RNA-seq quantification. *Nat Biotechnol* 34(5):525-527.
- 325 9. Li B, Ruotti V, Stewart RM, Thomson JA, Dewey CN (2010) RNA-Seq gene  
326 expression estimation with read mapping uncertainty. *Bioinformatics*  
327 26(4):493-500.
- 328 10. Buettner F, et al. (2015) Computational analysis of cell-to-cell heterogeneity in  
329 single-cell RNA-sequencing data reveals hidden subpopulations of cells. *Nat*  
330 *Biotechnol* 33(2):155-160.
- 331 11. Rothman KJ (1990) No adjustments are needed for multiple comparisons.  
332 *Epidemiology* 1(1):43-46.
- 333 12. Subramanian A, et al. (2005) Gene set enrichment analysis: a knowledge-based  
334 approach for interpreting genome-wide expression profiles. *Proc Natl Acad Sci U*  
335 *S A* 102(43):15545-15550.
- 336 13. Heinz S, et al. (2010) Simple combinations of lineage-determining transcription  
337 factors prime cis-regulatory elements required for macrophage and B cell  
338 identities. *Mol Cell* 38(4):576-589.
- 339 14. Welter D, et al. (2014) The NHGRI GWAS Catalog, a curated resource of  
340 SNP-trait associations. *Nucleic Acids Res* 42(Database issue):D1001-1006.
- 341 15. Landrum MJ, et al. (2016) ClinVar: public archive of interpretations of clinically  
342 relevant variants. *Nucleic Acids Res* 44(D1):D862-868.
- 343 16. Zhou X, et al. (2012) Experimental murine myopia induces collagen type Ialpha1  
344 (COL1A1) DNA methylation and altered COL1A1 messenger RNA expression in  
345 sclera. *Mol Vis* 18:1312-1324.
